# Supplementary material for: Systematic Review with Meta-Analysis: Lactobacillus reuteri DSM 17938 for Treating Acute Gastroenteritis in Children. An Update
Source: MDPI journal article supplement (doi:10.3390/nu11112762), 2019-11-14
Supplement: s1 [file s1]

## SUPPLEMENTARY MATERIALS

### **Systematic review with meta-analysis: *Lactobacillus reuteri* DSM 17938 for treating acute gastroenteritis in children. An update**

Bernadeta Patro-Gołąb<sup>1</sup>, Hania Szajewska<sup>1</sup>.

<sup>1</sup>Department of Paediatrics, The Medical University of Warsaw

#### **Corresponding author:**

Hania Szajewska, MD

The Medical University of Warsaw

Department of Paediatrics

02-091 Warsaw, Żwirki i Wigury 63A

Table S1. Example of search strategy for EMBASE.

---

((('lactobacillus' OR 'lactobacillus'/exp OR lactobacillus) AND reuteri OR l.) AND reuteri OR dsm) AND 17938 OR 'probiotic' OR 'probiotic'/exp OR probiotic OR 'probiotics' OR 'probiotics'/exp OR probiotics) AND ('pediatric' OR 'pediatric'/exp OR pediatric OR 'paediatric' OR 'paediatric'/exp OR paediatric OR 'child' OR 'child'/exp OR child OR 'children' OR 'children'/exp OR children OR 'infants' OR 'infants'/exp OR infants OR 'toddlers' OR 'toddlers'/exp OR toddlers OR 'adolescents' OR 'adolescents'/exp OR adolescents OR newborns) AND ('diarrhea' OR 'diarrhea'/exp OR diarrhea OR 'diarrhoea' OR 'diarrhoea'/exp OR diarrhoea OR diarrh\* OR 'gastroenteritis' OR 'gastroenteritis'/exp OR gastroenteritis) AND [2016-2019]/py AND [embase]/lim

---

Figure S1. The identification process for eligible trials (since January 2016, i.e., the date of the last search).

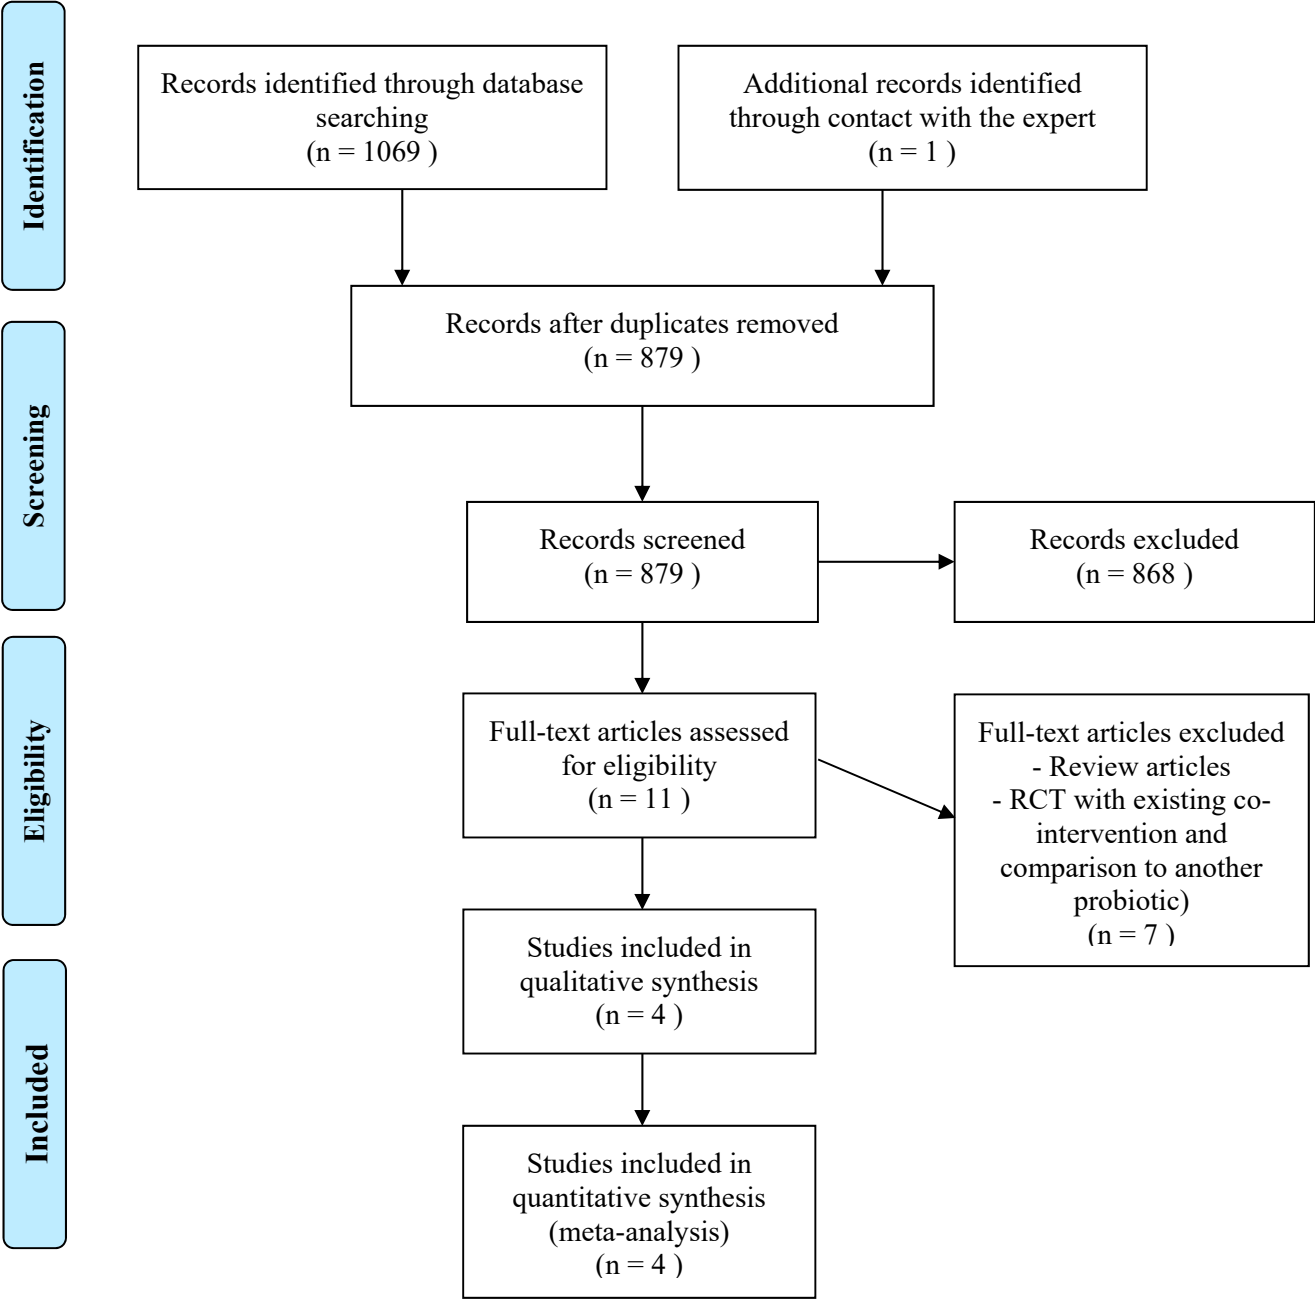

Figure S2. Risk of bias in the included studies.

|                                                    | Random sequence generation (selection bias) | Allocation concealment (selection bias) | Blinding of participants and personnel (performance bias) | Blinding of outcome assessment (detection bias) | Incomplete outcome data (attrition bias) | Selective reporting (reporting bias) | Other bias |
|----------------------------------------------------|---------------------------------------------|-----------------------------------------|-----------------------------------------------------------|-------------------------------------------------|------------------------------------------|--------------------------------------|------------|
| Dinleyici 2014 (1x10 <sup>8</sup> CFU/d, 5 d)(H)   | +                                           | +                                       | ●                                                         | ?                                               | ?                                        | ?                                    | +          |
| Dinleyici 2015 (1x10 <sup>8</sup> CFU/d, 5 d)(O)   | +                                           | ?                                       | ●                                                         | ?                                               | +                                        | +                                    | +          |
| FrancaVilla 2012 (4x10 <sup>8</sup> CFU/d, ? d)(H) | +                                           | +                                       | +                                                         | +                                               | ●                                        | ?                                    | +          |
| Szymański 2019 (2x10 <sup>8</sup> CFU/d, 5 d)(H)   | +                                           | +                                       | +                                                         | +                                               | +                                        | +                                    | +          |
